# Supplementary figures and images for: Characterization and Function Analysis of Soluble Dietary Fiber Obtained from Radish Pomace by Different Extraction Methods
Source: MDPI journal article supplement (doi:10.3390/molecules29020500), 2024-01-19

Supplementary Materials:

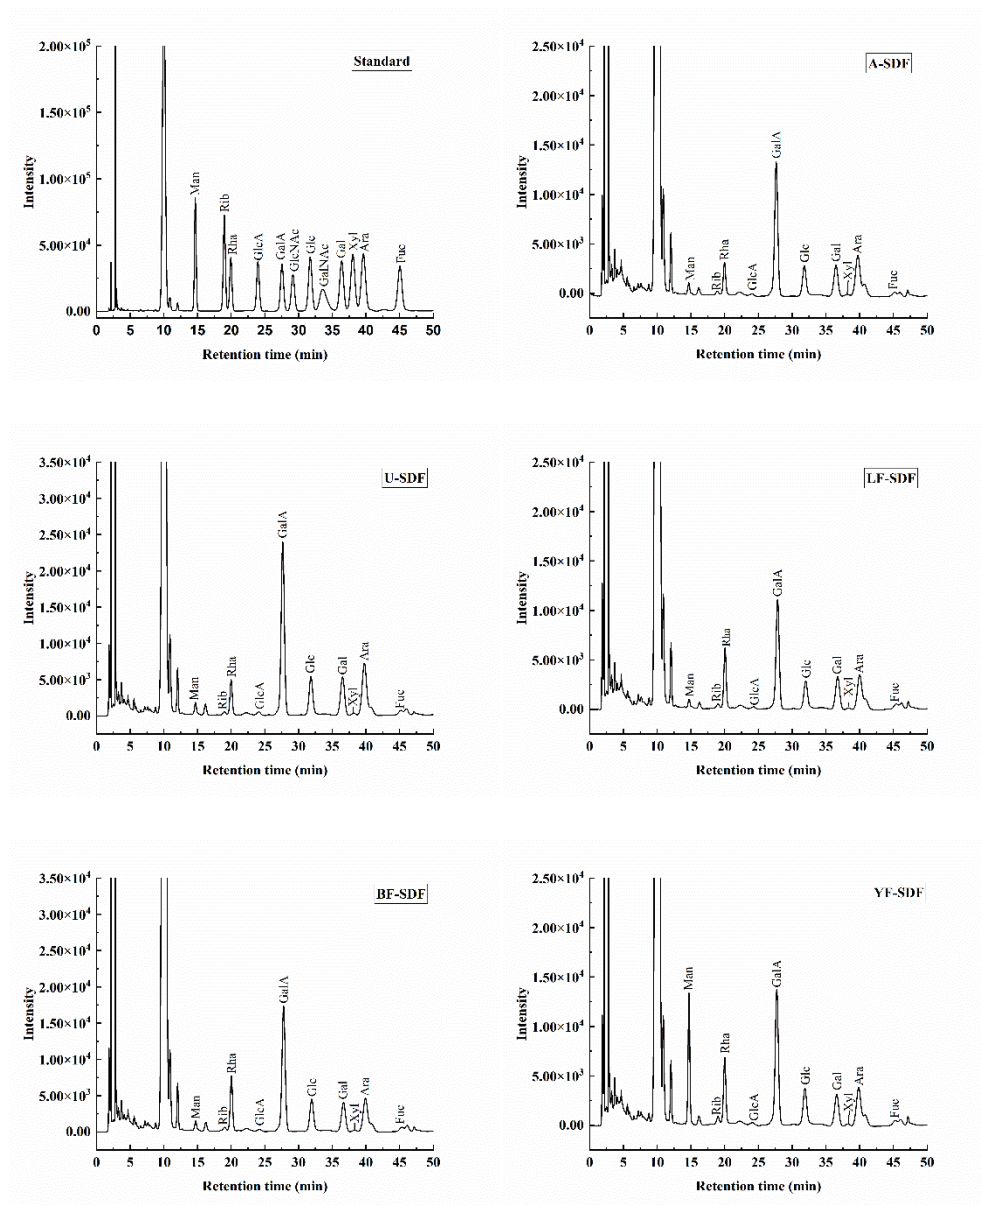

Figure S1: HPLC analysis of the SDFs.

Supplement: s1 [file s1]
